# Supplementary material for: Analysis on the Efficiency of Health Care Service Delivery and Influencing Factors in China: A Study Based on DEA-Malmquist Index and Tobit Model
Source: Research Square preprint supplement (doi:10.21203/rs.3.rs-123126/v1), 2020-12-15
Supplement: Supplementary file 1 [file a7cf4faeb995e72c0ed07950.xls]

## Sheet: 2018
Provinces	Overall efficiency	Bed occupancy rate （%）	Average length of hospital stays（Day）	Associate’s degree or above（%）	Gross regional domestic product（one hundred million yuan）	The percentage of health care expenditure（%）	The percentage of primary care visits（%）
Beijing	1	83.4	10.1	47.61	30320	0.237053	8.2
Tianjin	1	77.5	9.2	28.85	18809.6	0.23028	9
Hebei	1	82.7	9	9.99	36010.3	0.278263	9.2
Shanxi	0.847	79.6	10.5	14.92	16818.1	0.253687	11
Inner Mongolia	0.808	76.1	9.6	18.13	17289.2	0.265144	9.4
Liaoning	0.822	78.1	10.3	17.34	25315.3	0.228449	10.5
Jilin	0.764	76	9.3	14.82	15074.6	0.286768	11.7
Heilongjiang	0.916	73.8	10.2	13.38	16361.6	0.225663	13.2
Shanghai	1	95.9	10.2	34.03	32679.9	0.260116	7.1
Jiangsu	0.901	86.4	9.6	17.29	92595.4	0.327967	8.1
Zhejiang	1	89.5	9.6	15.58	56197.8	0.304232	7
Anhui	0.96	83.3	8.7	9.52	30006.8	0.269388	7.2
Fujian	0.974	83.9	8.6	15.08	35804	0.314765	5.4
Jiangxi	1	86.7	8.9	8.43	21984.8	0.269515	6.3
Shandong	0.97	82.5	8.8	13.26	76469.7	0.288283	8.7
Henan	1	87.6	9.5	8.66	48055.9	0.255653	10.2
Hubei	1	92.7	9.4	16.2	39366.6	0.30316	9.8
Hunan	1	84.3	9.2	11.81	36425.8	0.283445	9.1
Guangdong	1	83	8.9	14.04	97277.8	0.298573	5.8
Guangxi	1	87.6	8.7	7.65	20352.5	0.330296	9.1
Hainan	1	79.6	8.9	13.12	4832.05	0.293448	7.1
Chongqing	1	82.2	9.4	13.65	20363.2	0.30465	8.6
Sichuan	1	88.7	10.5	10.69	40678.1	0.303609	8.9
Guizhou	1	81.8	8.1	9.57	14806.5	0.271059	7.9
Yunan	1	85.8	8.6	8.51	17881.1	0.268403	8.9
Tibei	1	64.6	8.9	8.37	1477.63	0.28841	4
Shaanxi	1	84	8.9	15.28	24438.3	0.253118	10.8
Gansu	1	81.6	8.4	13.9	8246.07	0.307871	10.8
Qinghai	1	73.2	9	11.65	2865.23	0.239	11.1
Ningxia	1	79.9	8.9	15.72	3705.18	0.232729	10.3
Xinjiang	0.967	85.6	8.5	18.09	12199.1	0.251521	9.8
